# Supplementary material for: Modulation of liquid structure and controlling molecular diffusion using supramolecular constructs
Source: Royal Society of Chemistry journal article supplement (doi:10.1039/d1cc04417f), 2021-01-01
Supplement: d1cc04417f1.pdf [file d1cc04417f1.pdf]

## Supporting Information

### pH Regulated Shaping of Pillar[5]arene Droplets at Liquid-Liquid Interface

Rohit Varshney, Chinmayee Agashe, Arshdeep Kaur Gill, Mujeeb Alam, Roymon Joseph, and  
Debabrata Patra\*

#### Table of Contents:

1. General Information: Materials and Characterization details
2. DLS data of P[5]AA at pH 2 and 10.
3. ATR-IR Spectra of P[5]AA at pH 10 and 2.
4. Zeta potential measurements
5. Supplementary videos:
  - SV1\_ Aqueous P[5]AA droplet at pH 2
  - SV2\_ Aqueous P[5]AA droplet at pH 4
  - SV3\_ Aqueous P[5]AA droplet at pH 6
  - SV4\_ Refilling of acidized P[5]AA aqueous solution suspended in toluene phase.
  - SV5\_ Assembly of P[5]AA in presence of acidized toluene
  - SV6\_ Disassembly of P[5]AA in presence of alkaline toluene
  - SV7\_ Enzyme catalysis mediated assembly
  - SV8\_ Lock state
  - SV9\_ Unlock State

#### General Information:

**Materials:** Anionic Pillar[5]arene was synthesized according to previously reported literature<sup>1</sup>. Toluene was purchased from Merck Millipore and used without purification. Millipore water (18.2 M $\Omega$ •cm at 25 °C) was used in all interfacial tension measurements.

**Characterization:** The dynamic interfacial tension ( $\gamma$ ) was analyzed by a tensiometer (Drop Shape Analyzer – DSA25 - KRÜSS GmbH) using a pendant-drop method, where the evolution of  $\gamma$  with time was recorded after the water phase was slowly injected into the toluene phase. The deformation and wrinkling behaviour were recorded as images or videos with a digital camera. The morphology of P[5]AA NPs was characterized by transmission electron microscopy using JEOL JEM-2100 microscope operating at acceleration voltage 200KV and dynamic light scattering (Malvern Zetasizer Nano ZSP ZEN5600) was used for size distribution measurements. Zeta potential measurements were carried out using (Malvern Zetasizer Nano ZSP ZEN5600). Intermolecular hydrogen bonding analysis was carried out using Thermo Scientific Nicolet iS5 FTIR Spectrometer. UV absorption spectra was measured on a SHIMADZU UV-2600 spectrophotometer.

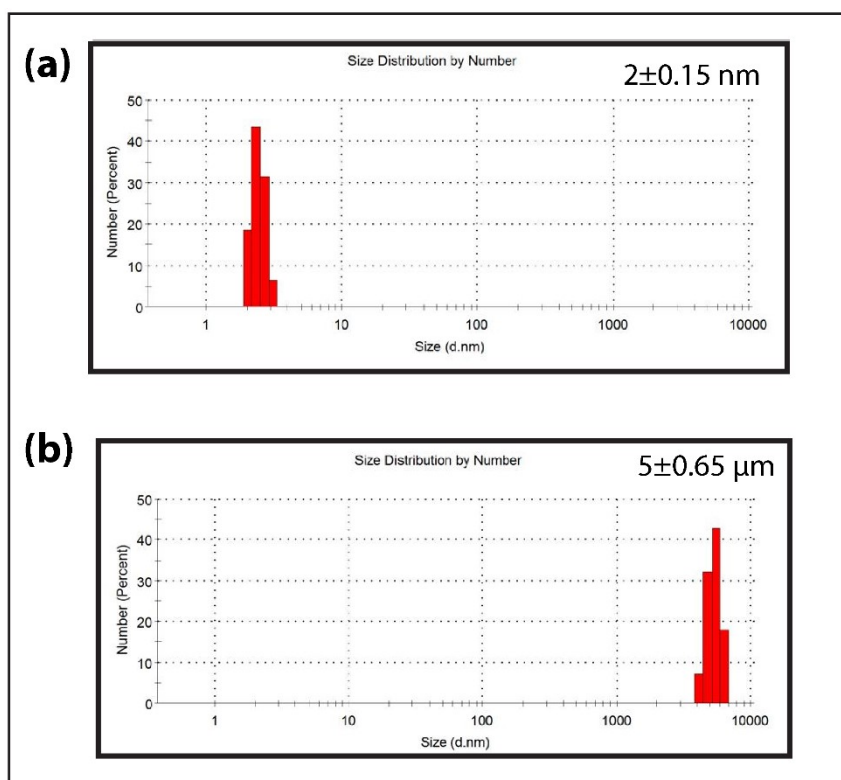

Figure S1. DLS data of P[5]AA NPs at (a) pH 2 and (b) pH 10.

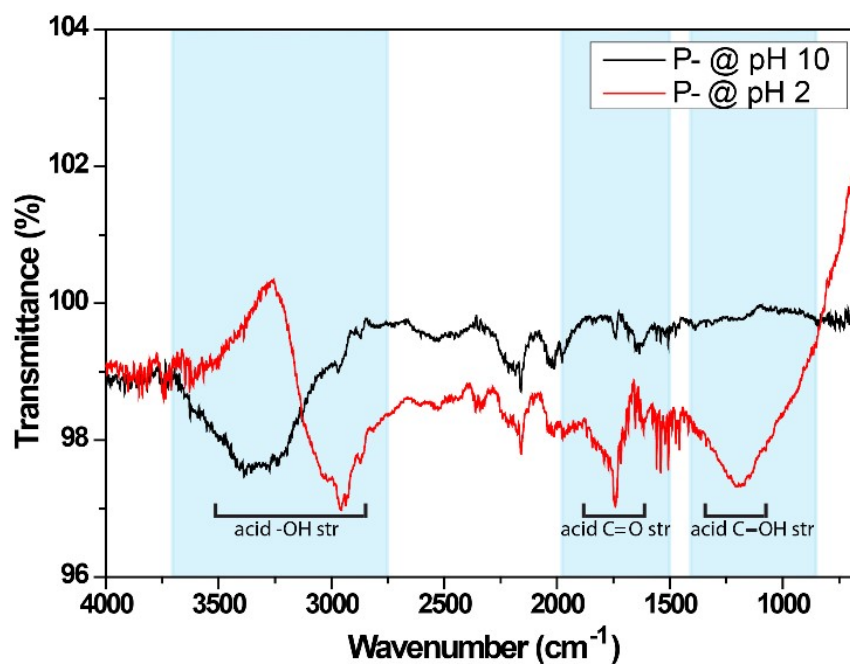

Figure S2. Comparison of the ATR-IR spectra for the P[5]AA NPs at pH 10 and 2.

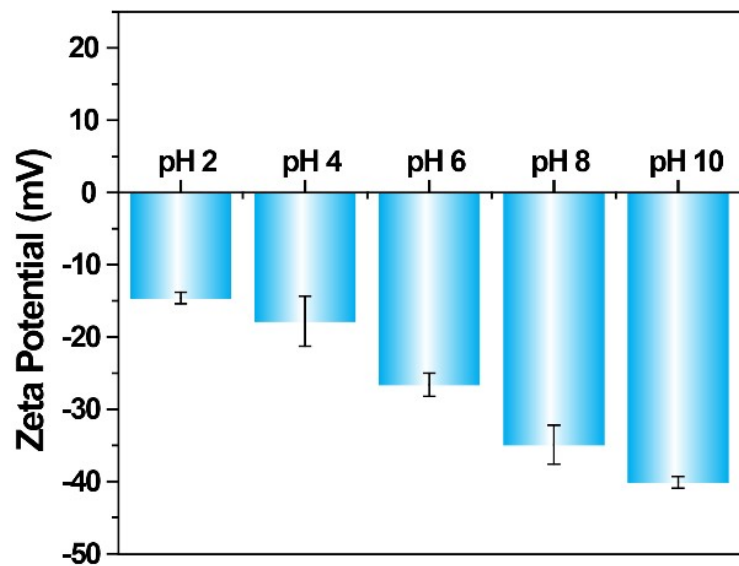

Figure S3. Zeta Potential plot at different pH of P[5]AA NPs.

**Reference:**

- 1) R. Varshney, M. Alam, C. Agashe, R. Joseph, D. Patra, *Chem. Commun.* 2020, **56**, 9284-9287.
